# Supplementary material for: Characterizing patterns of diffusion tensor imaging variance in aging brains
Source: bioRxiv or medRxiv preprint supplement (doi:10.1101/2023.08.22.23294381), 2024-09-04

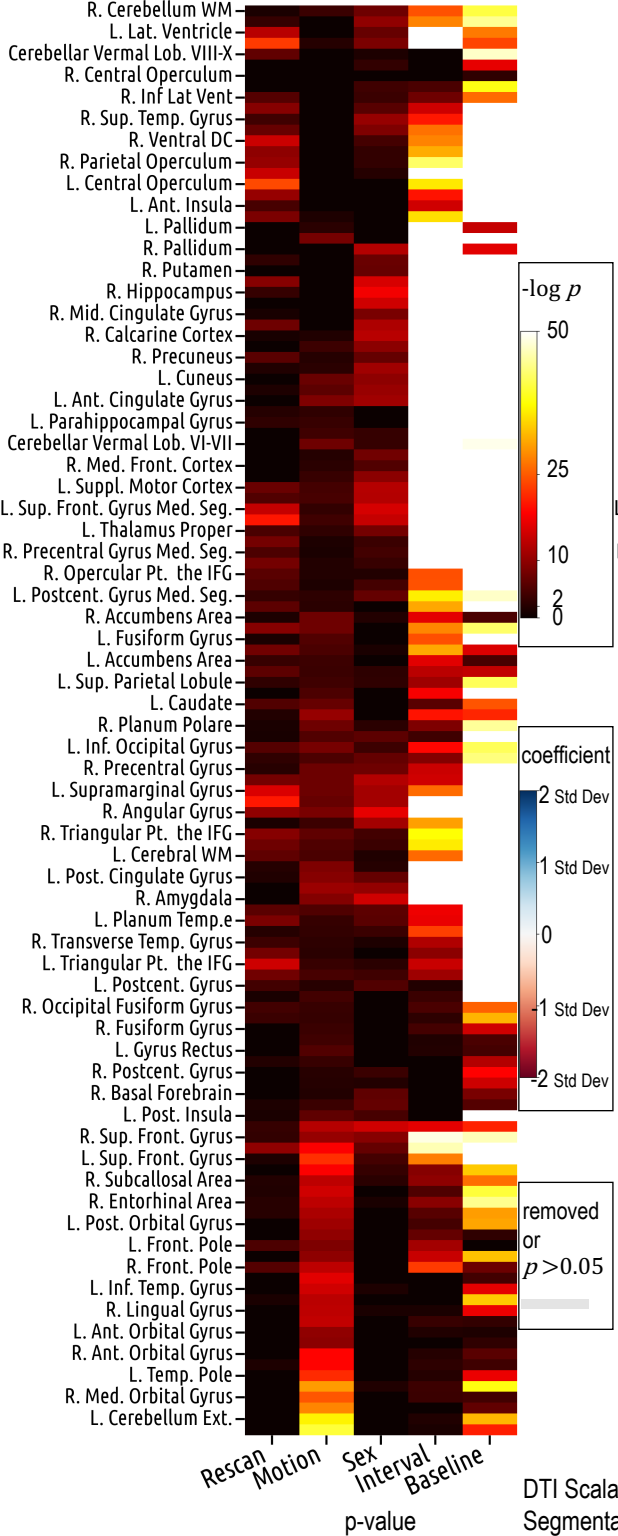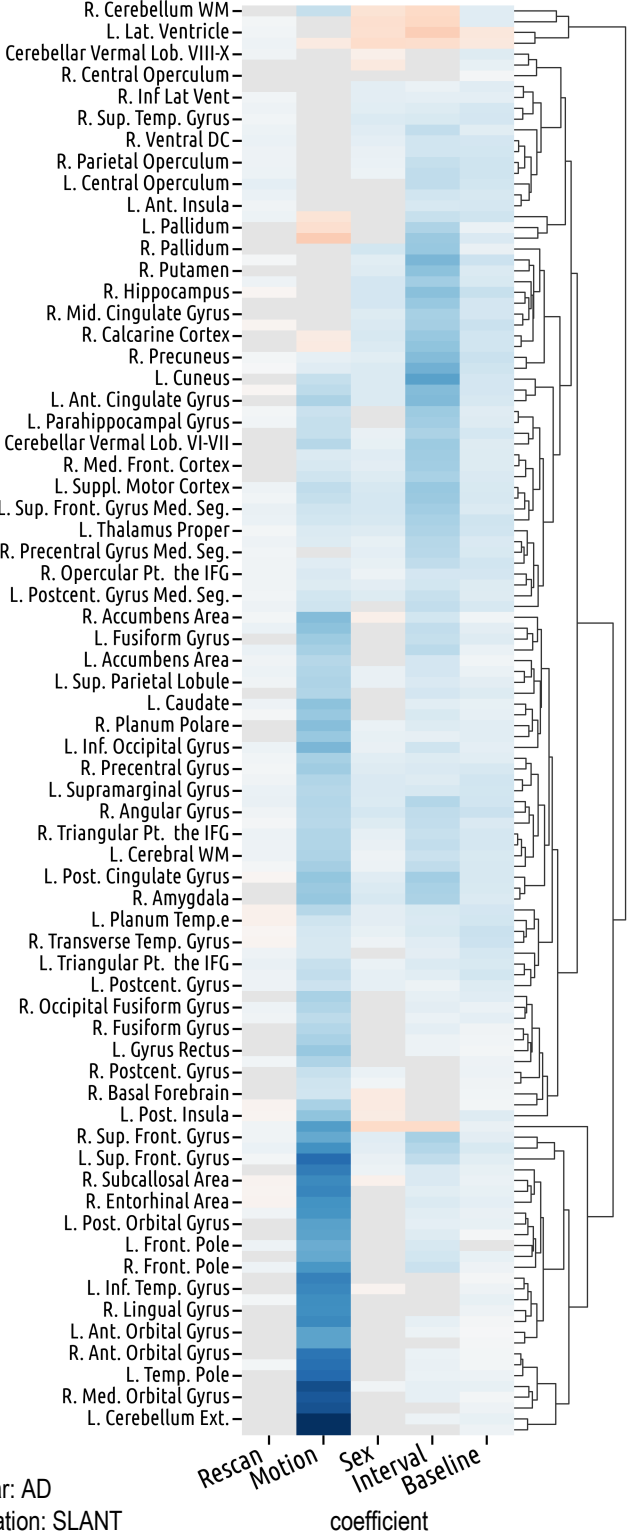

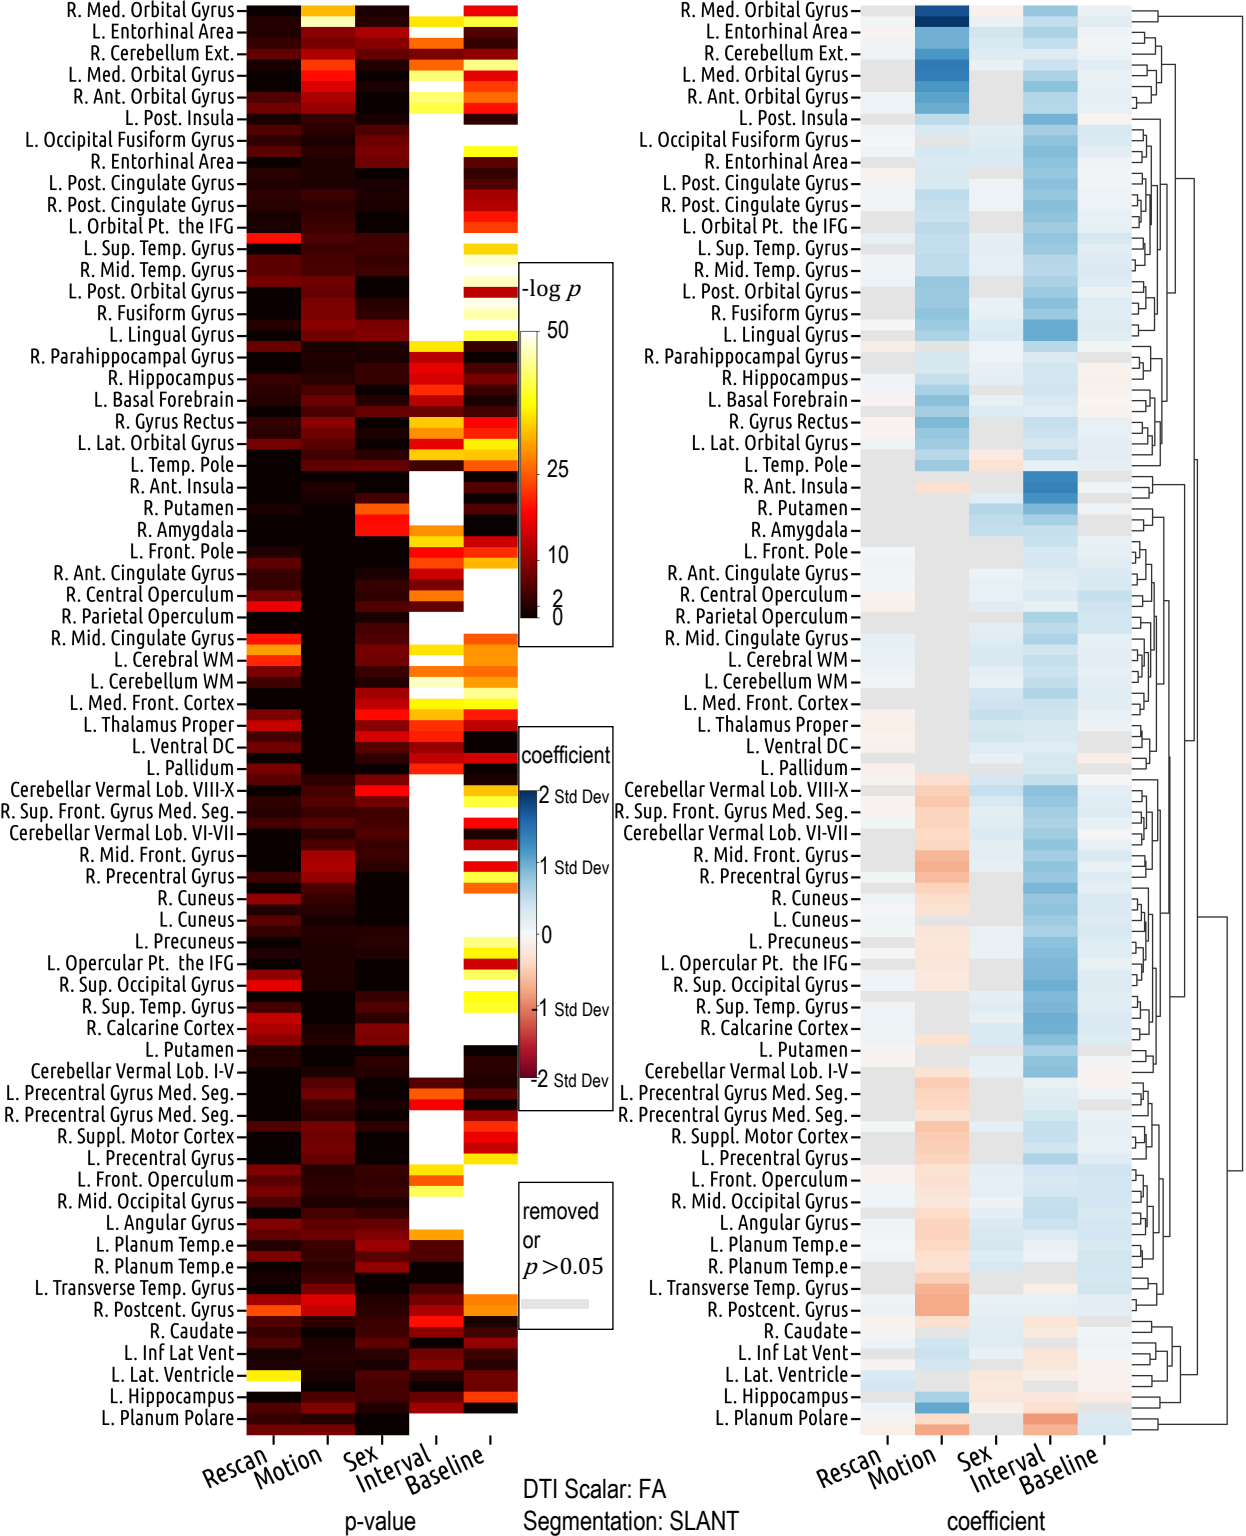







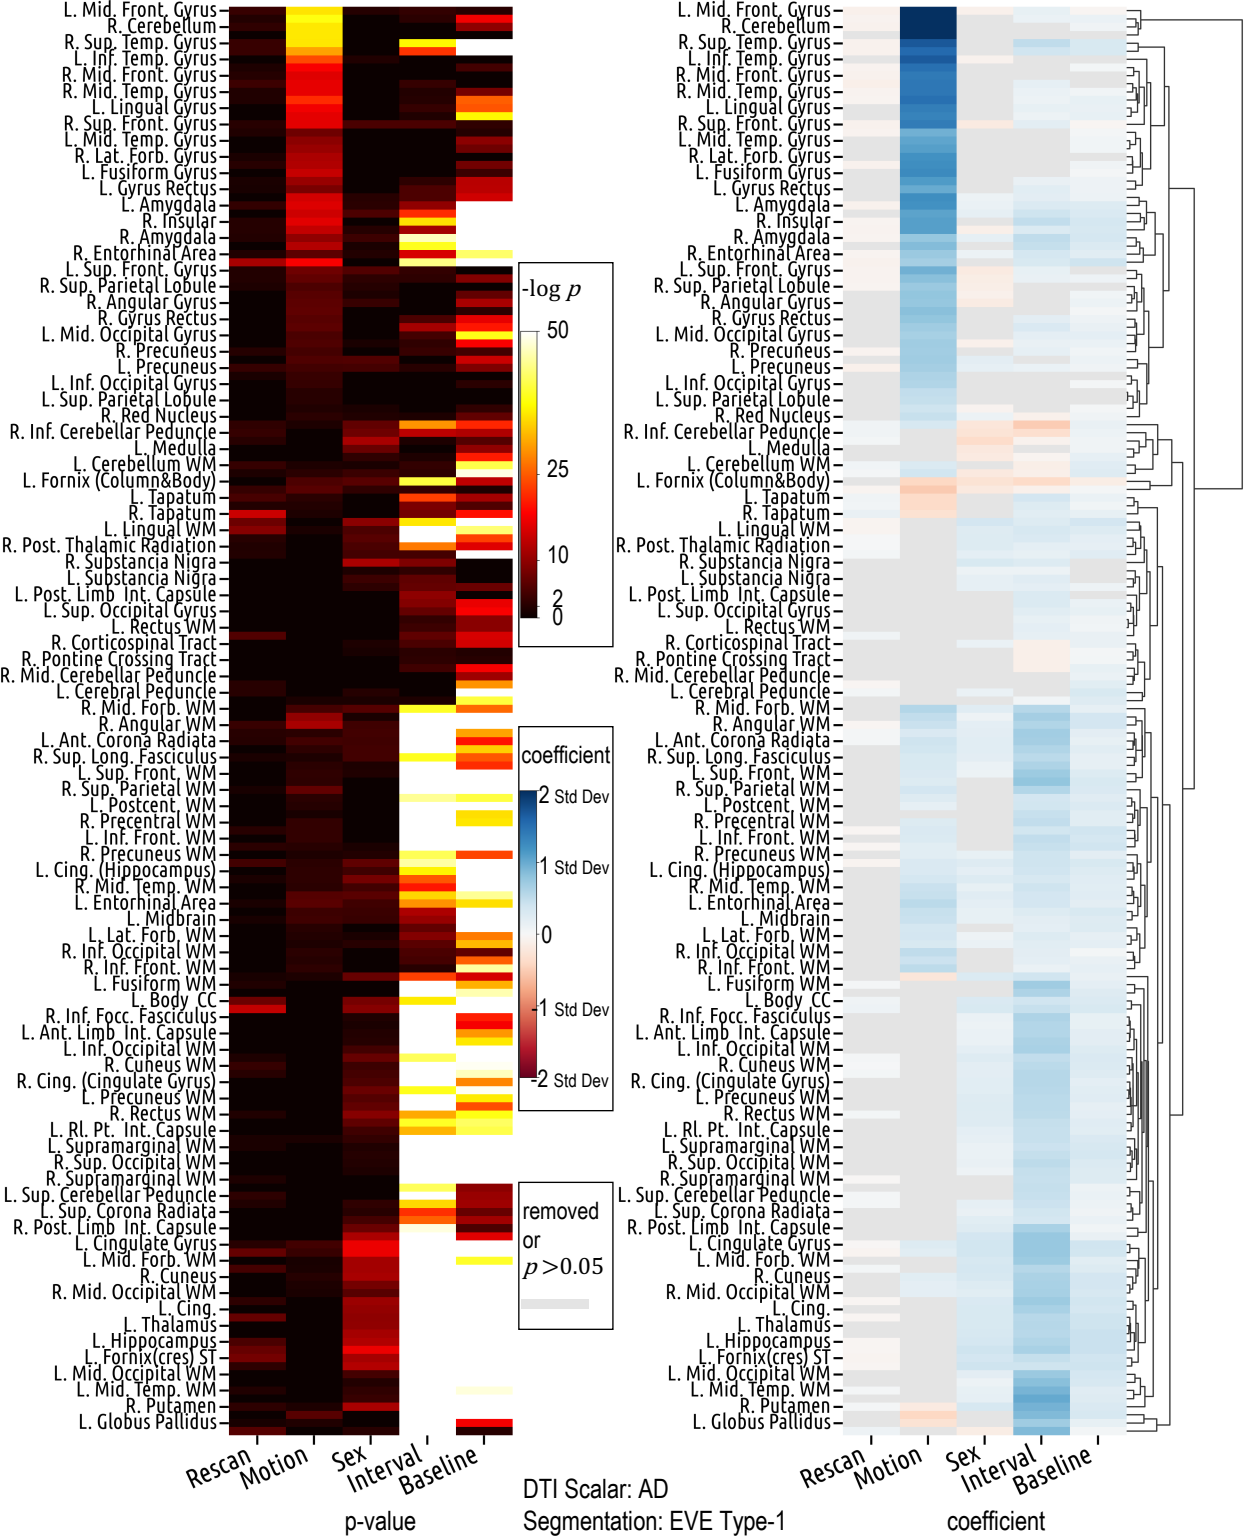

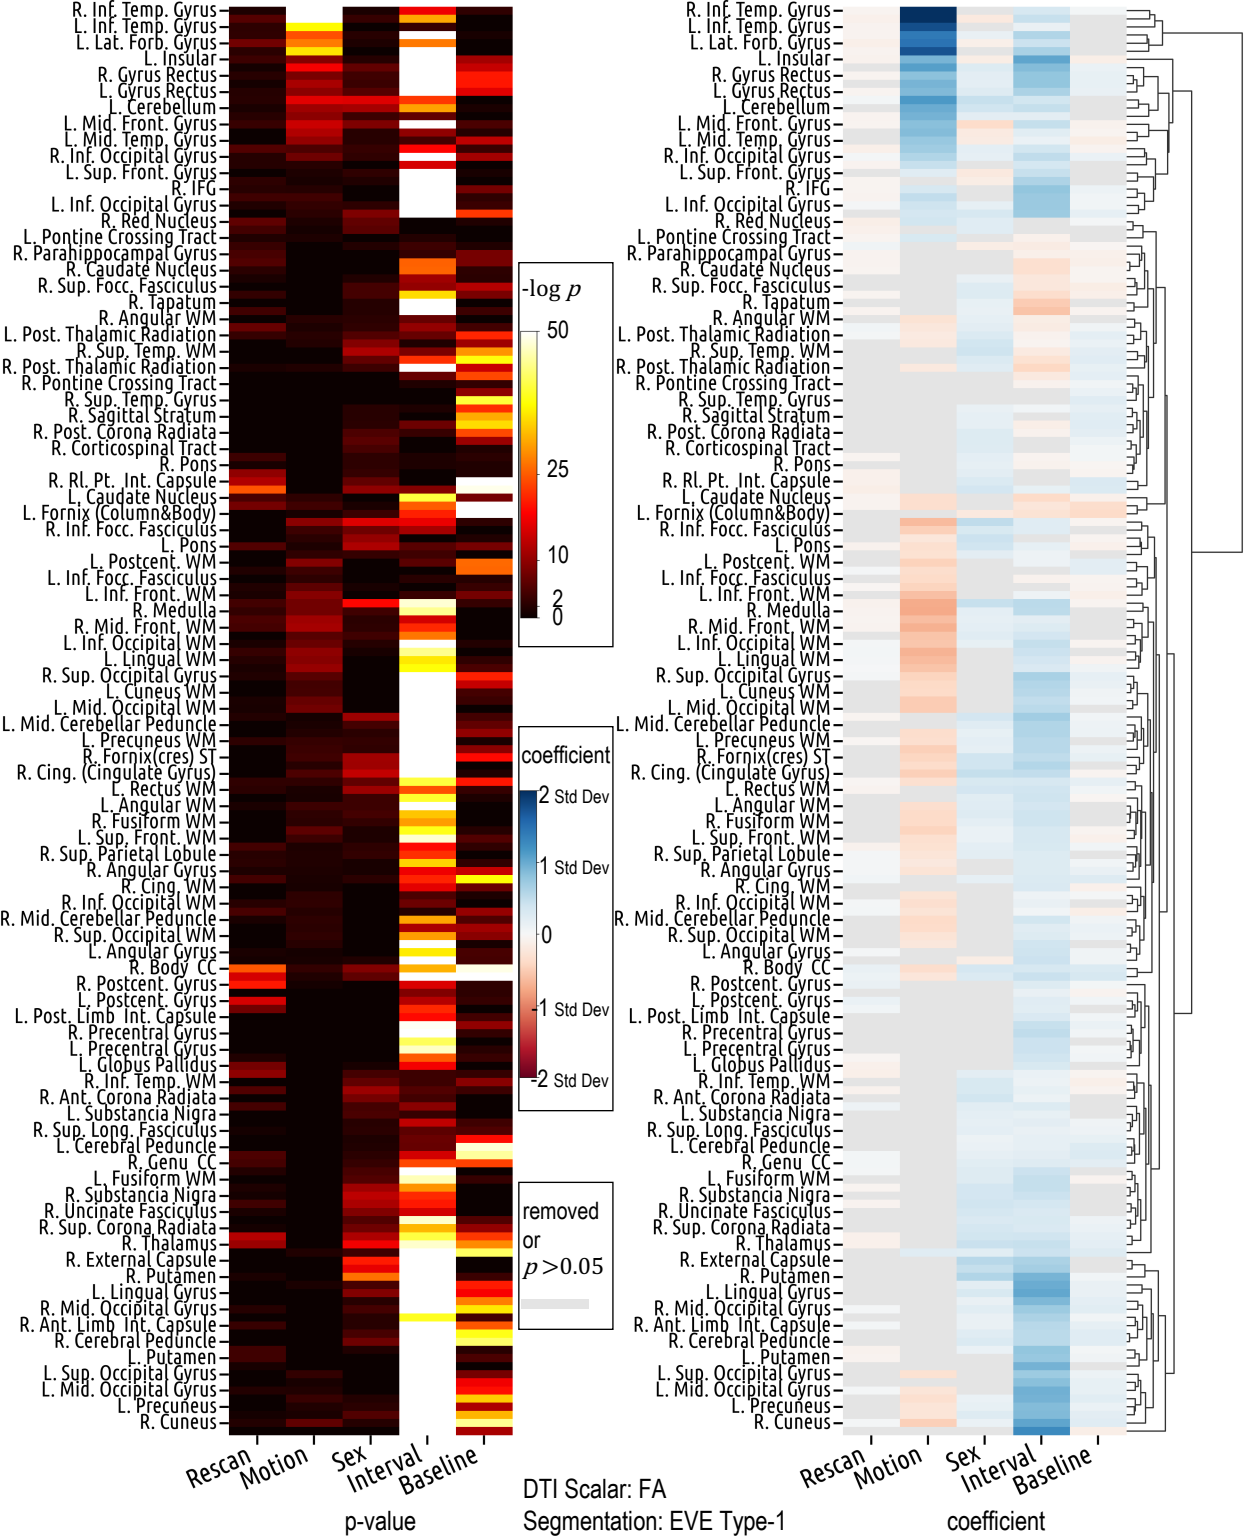

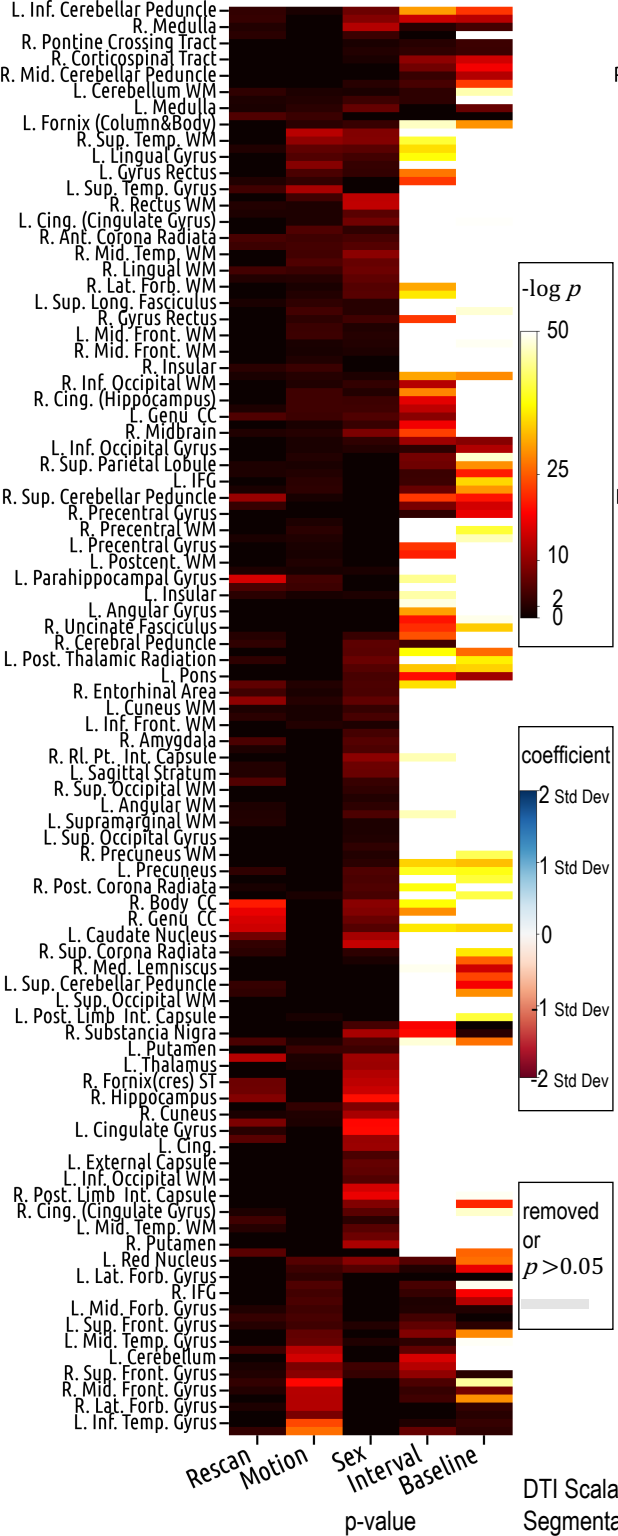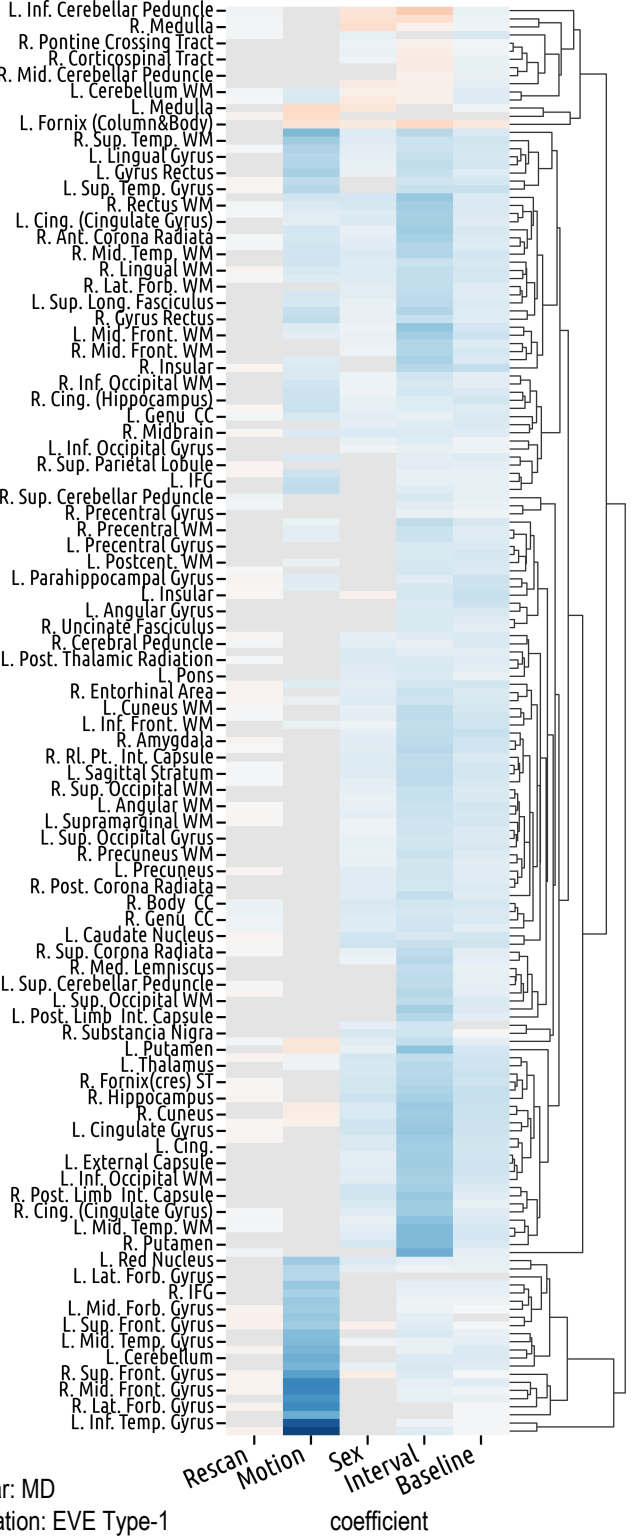

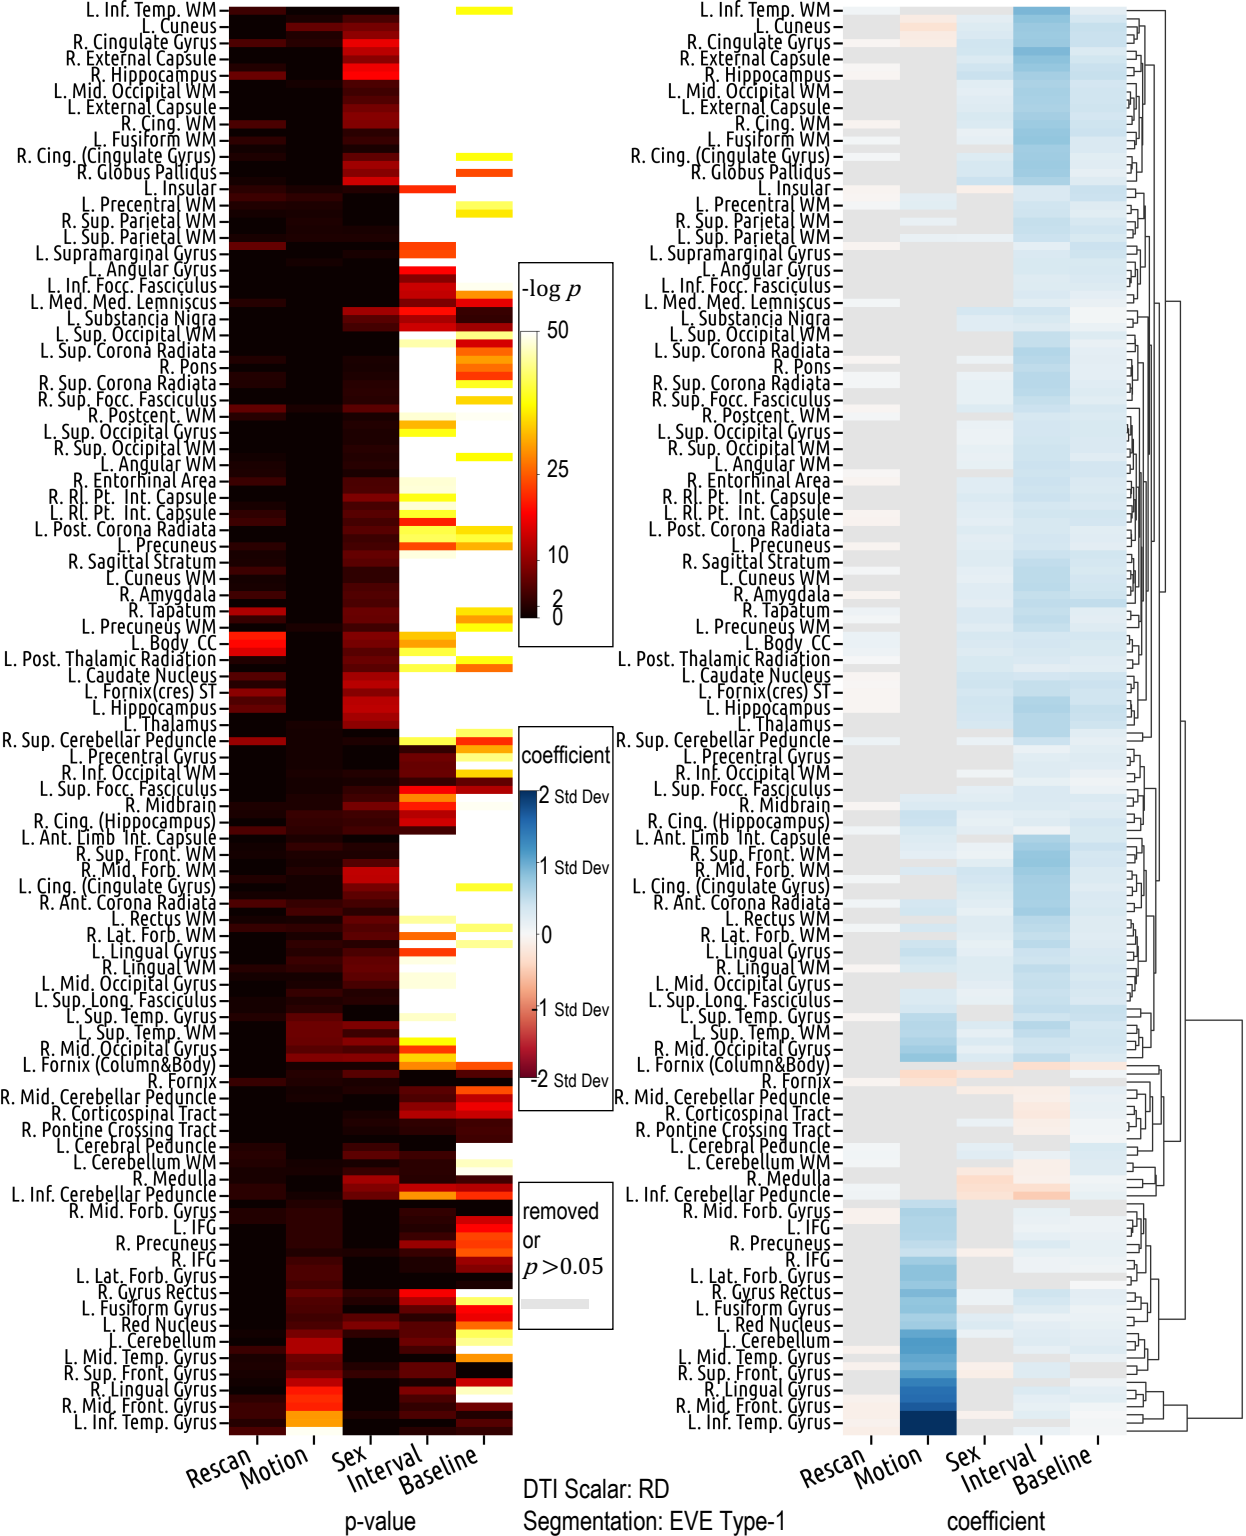

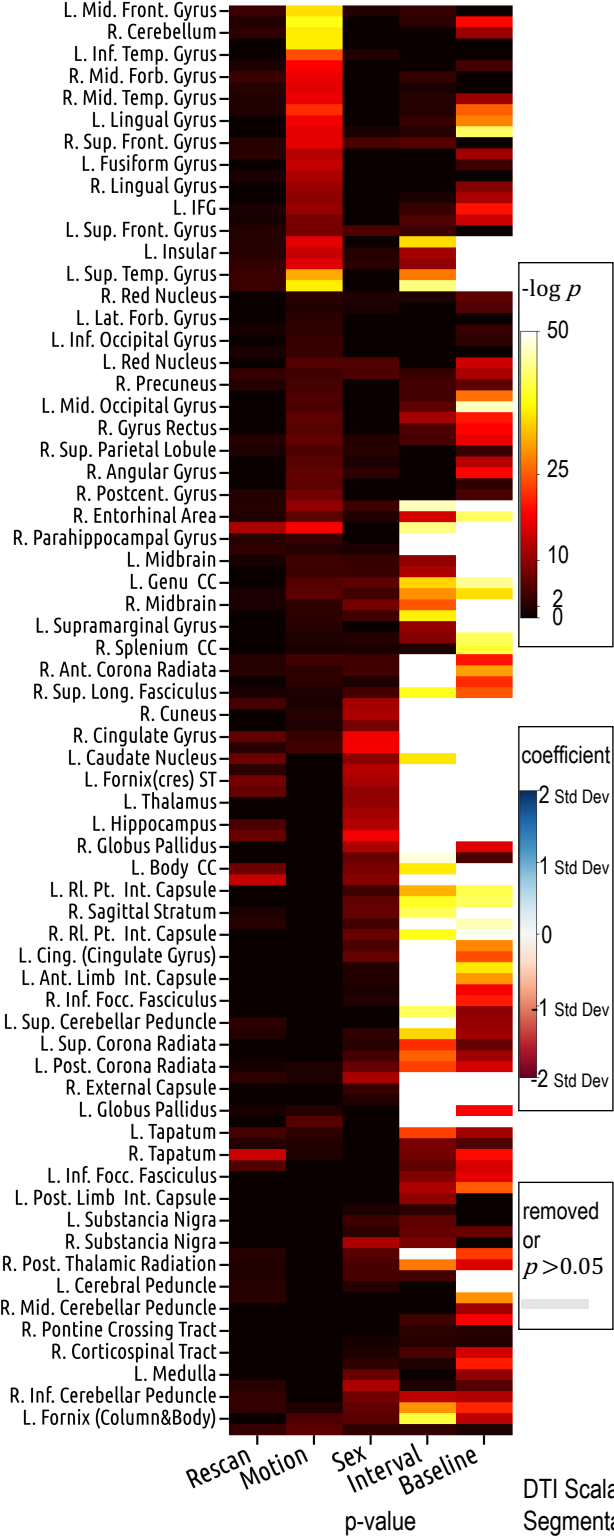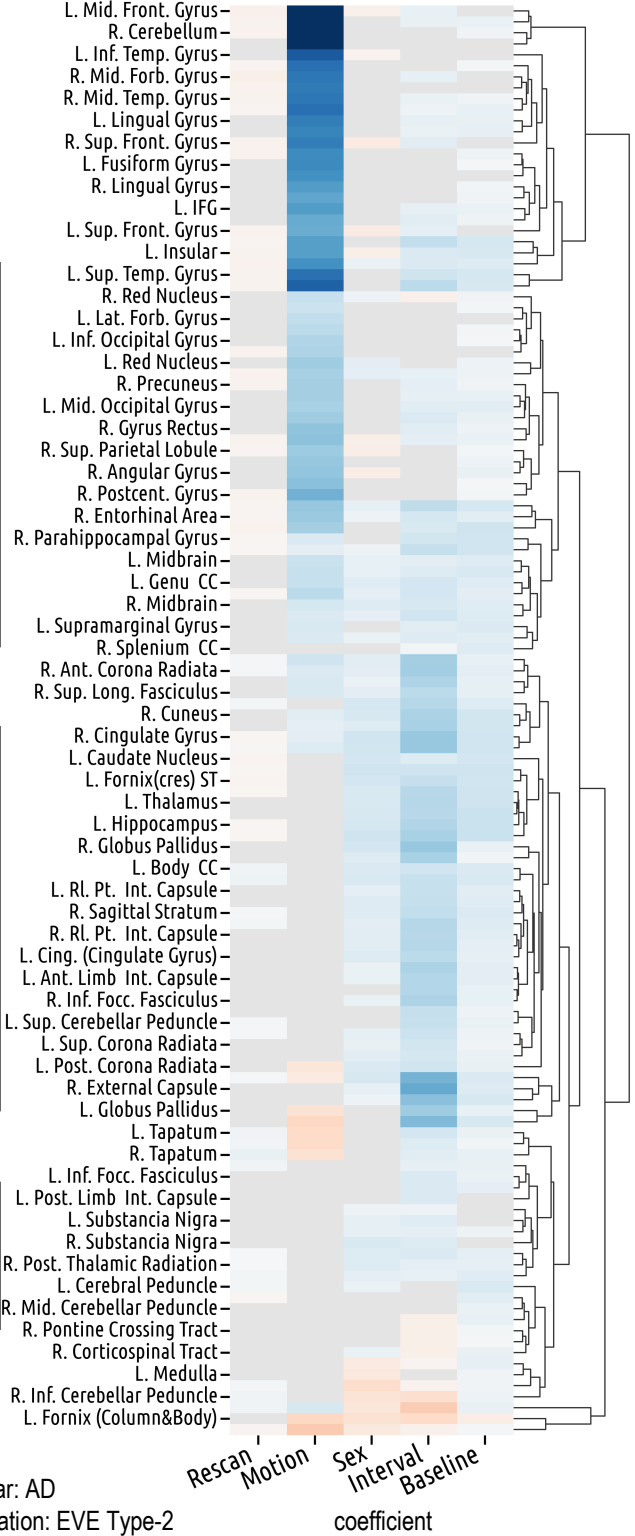

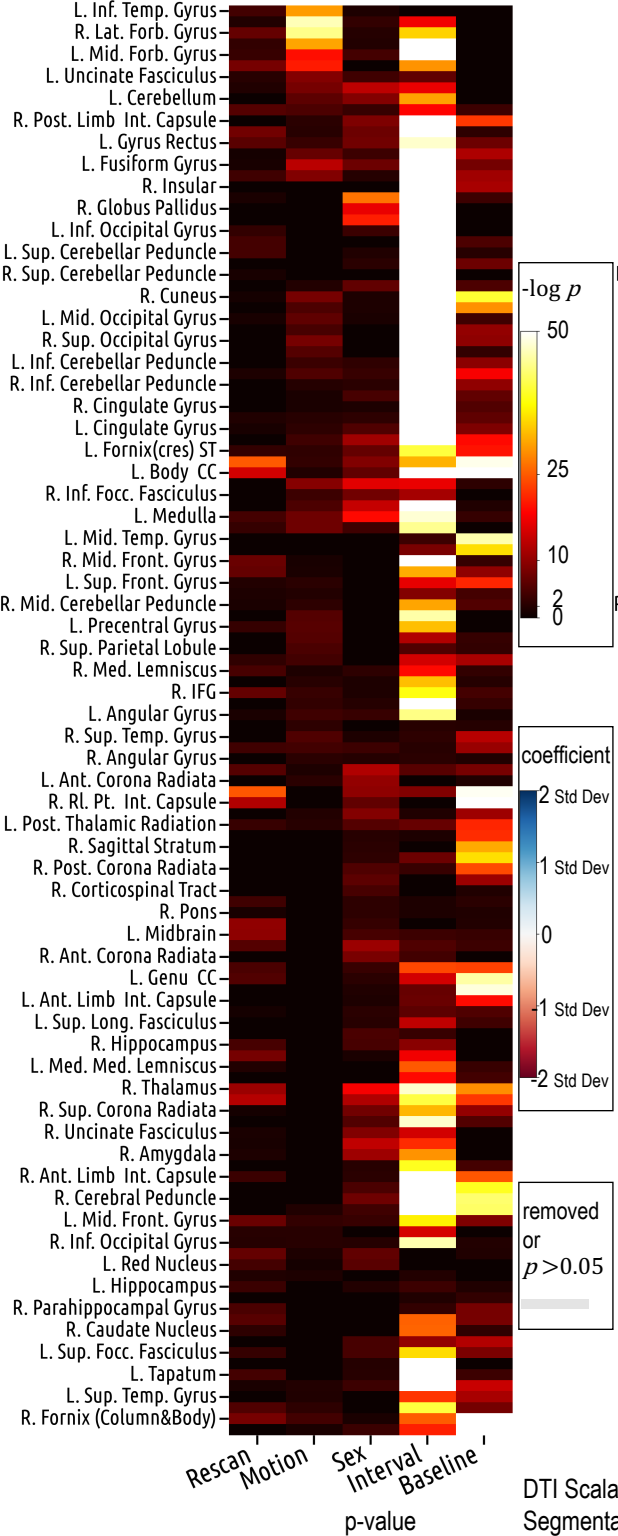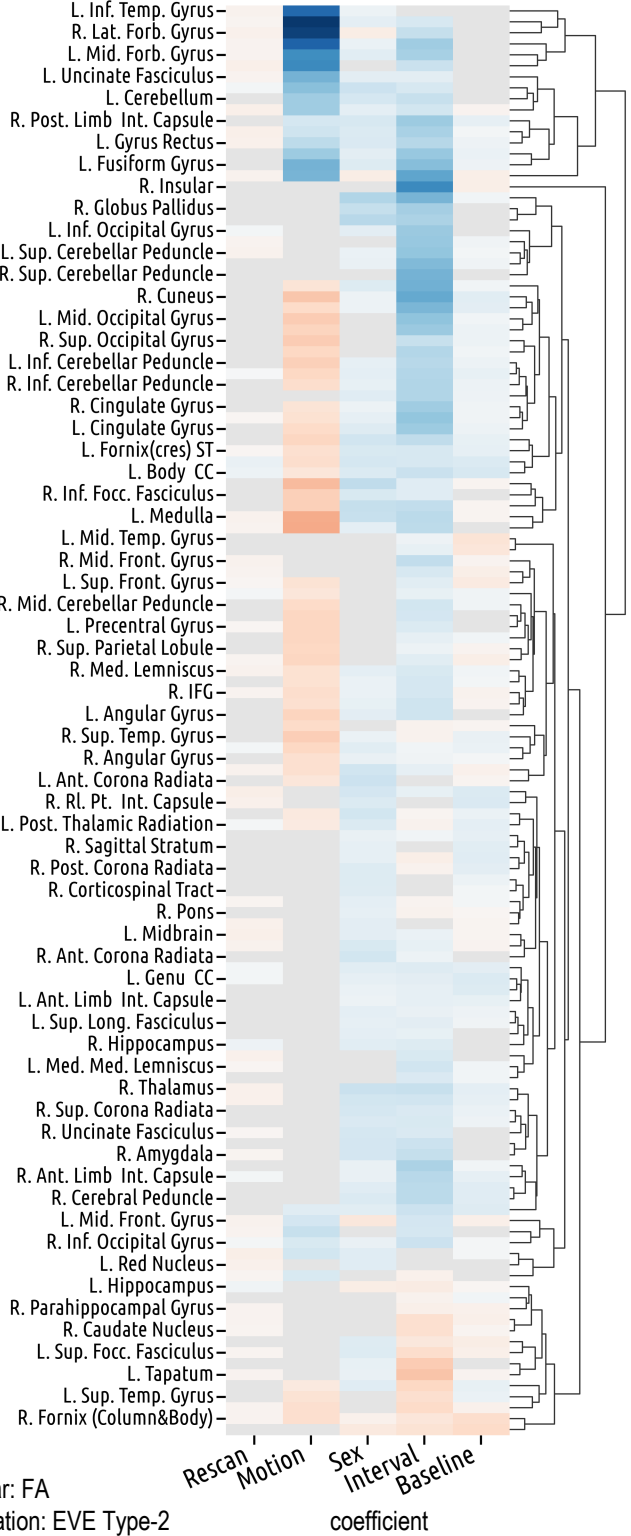

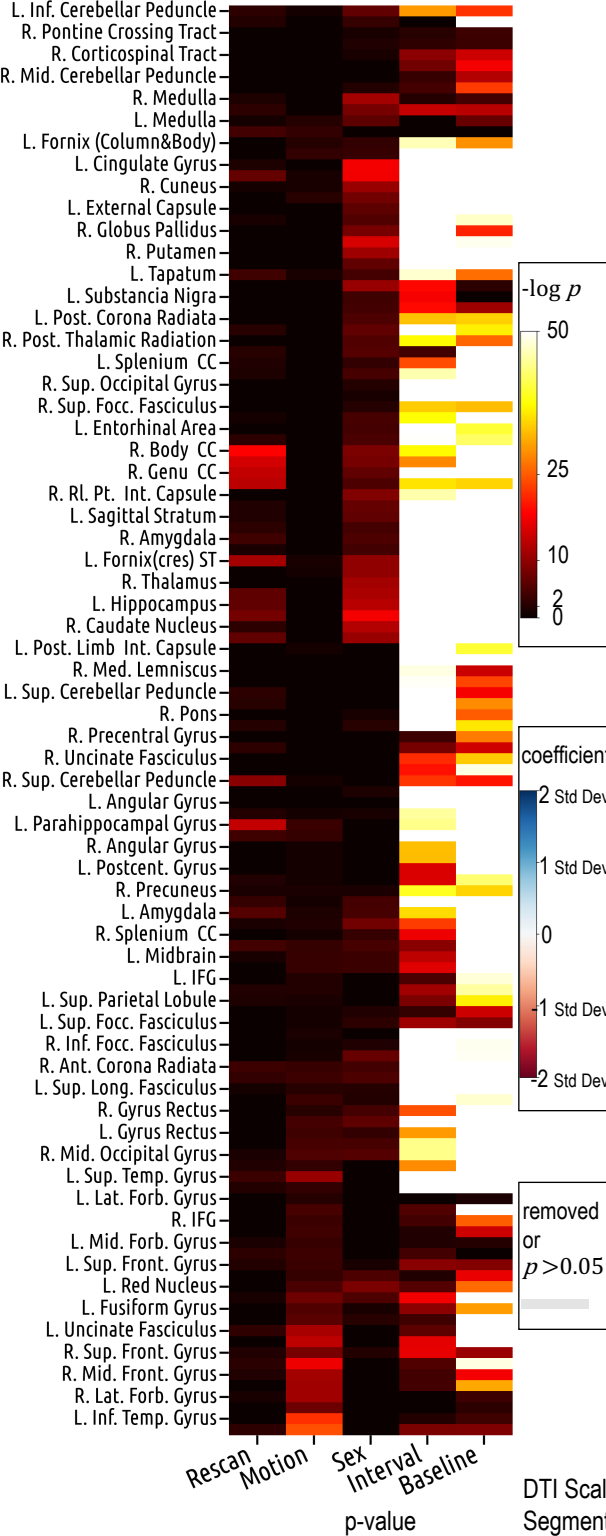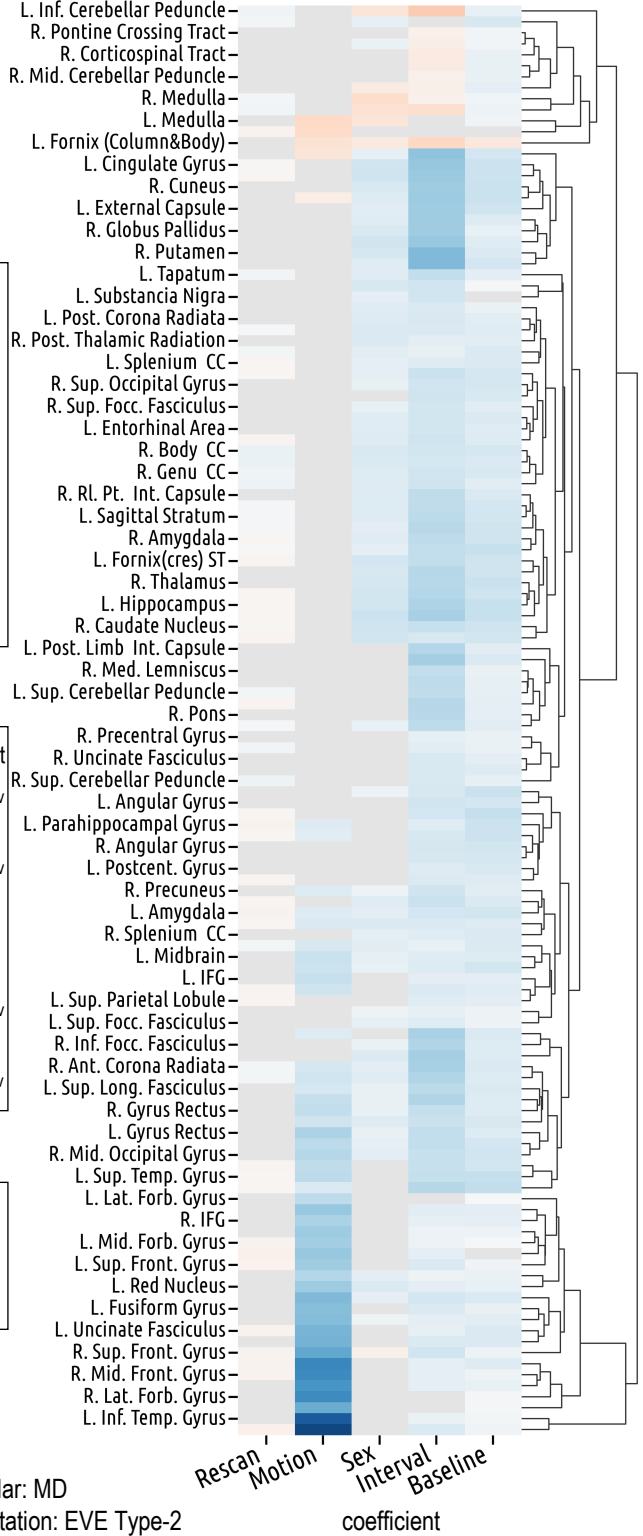

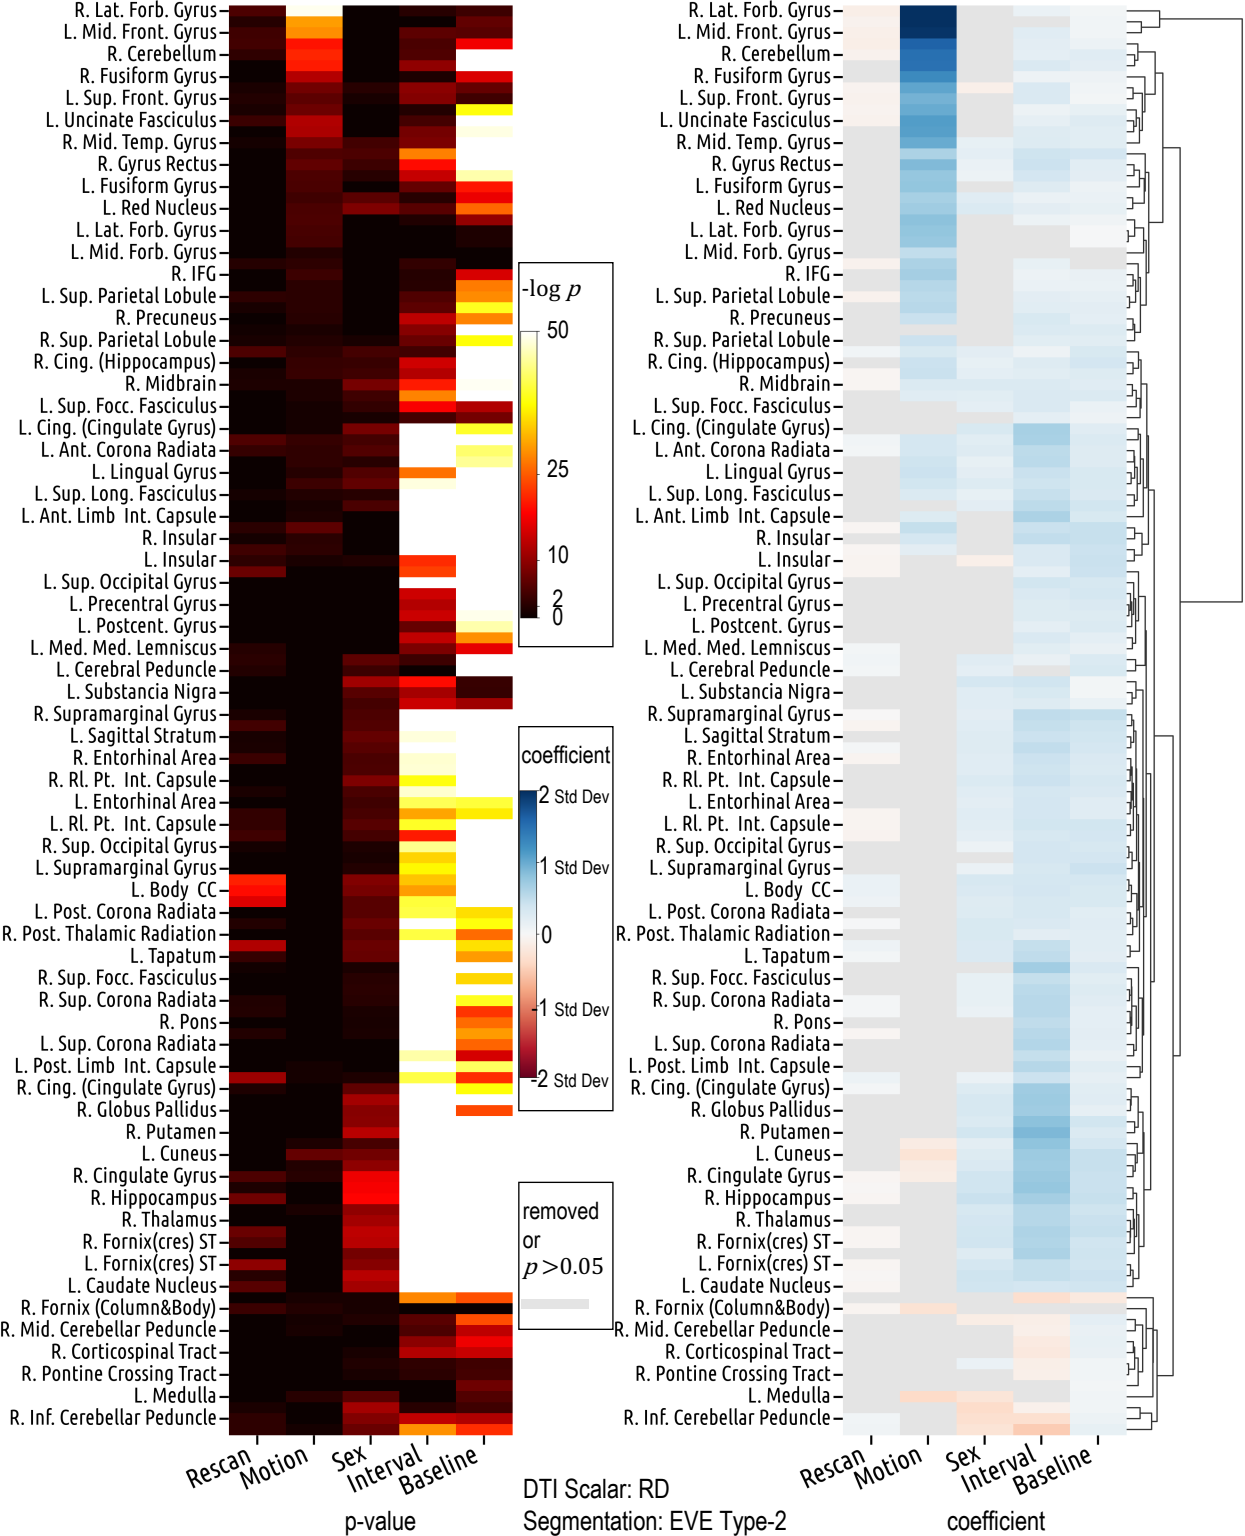



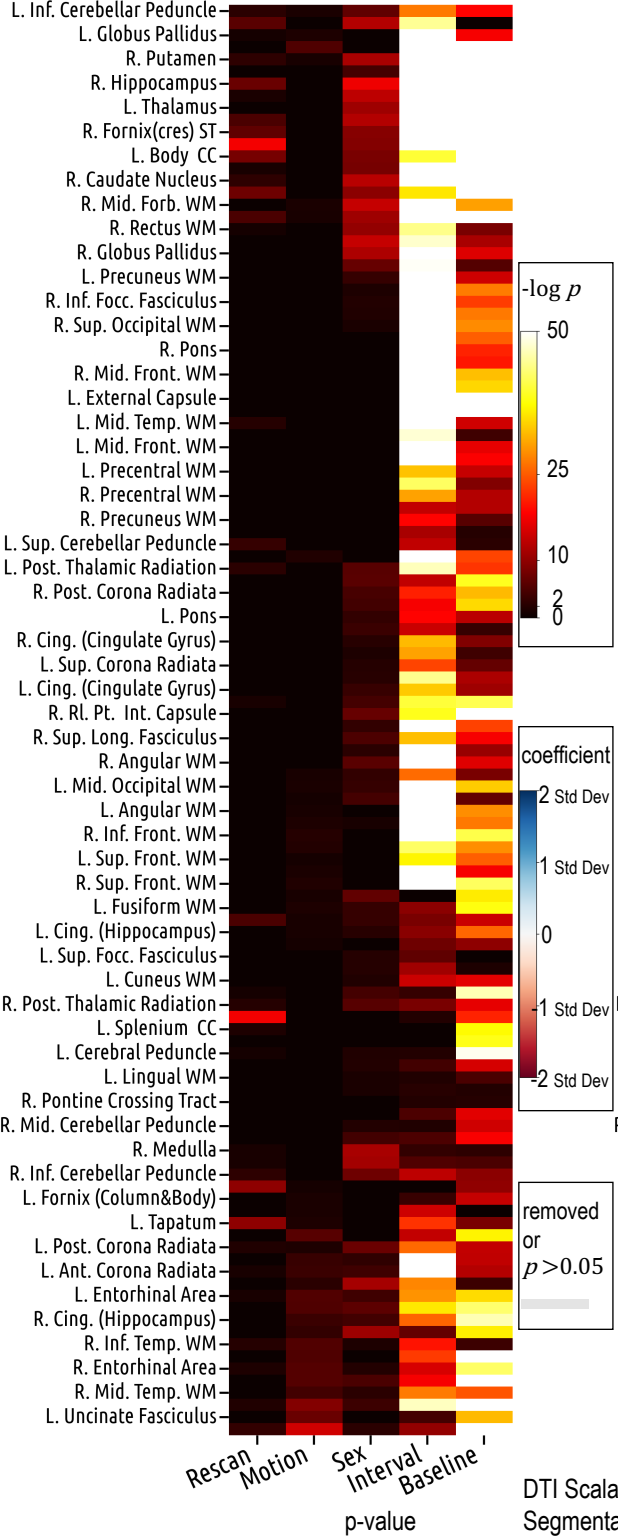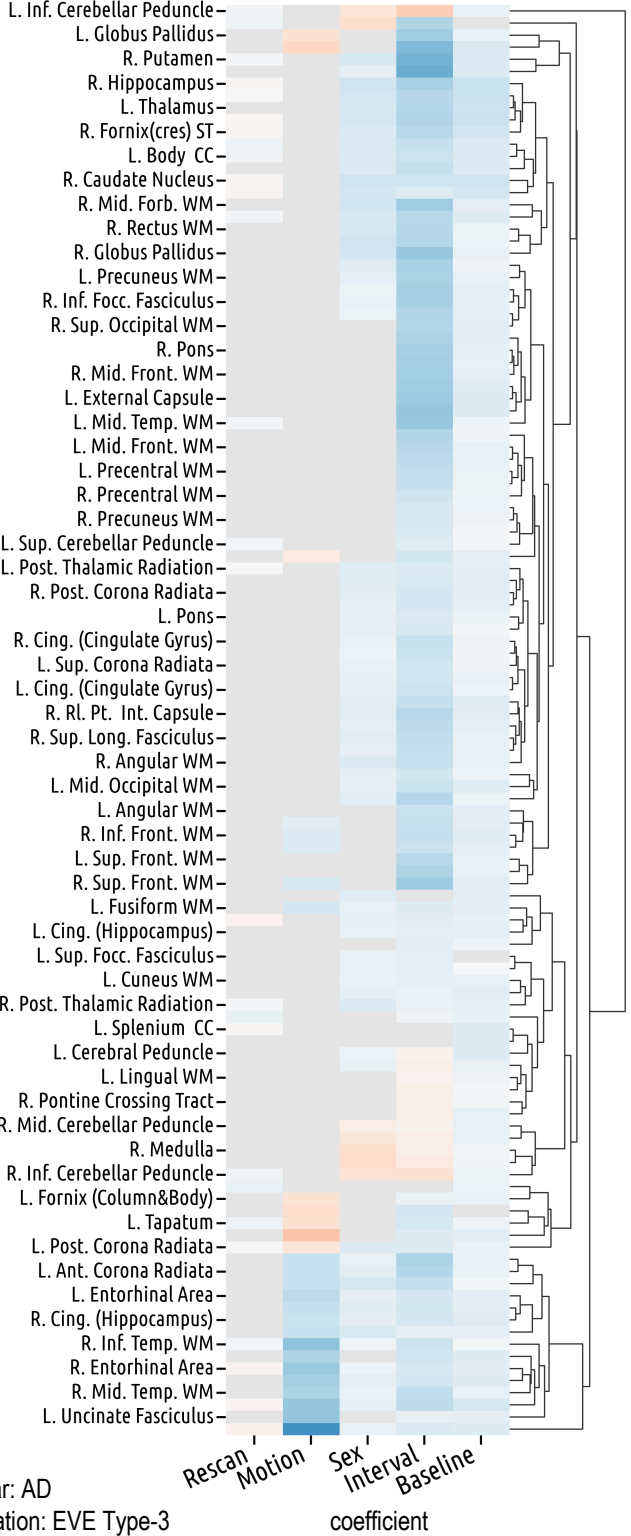

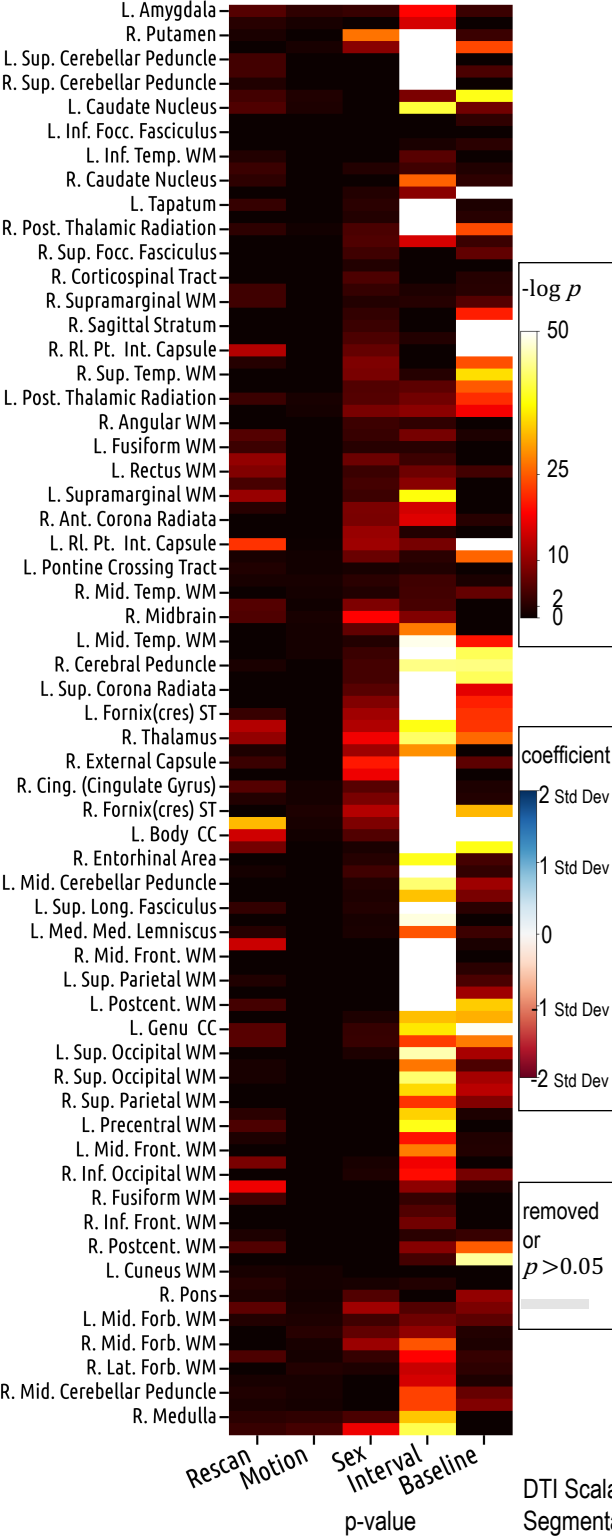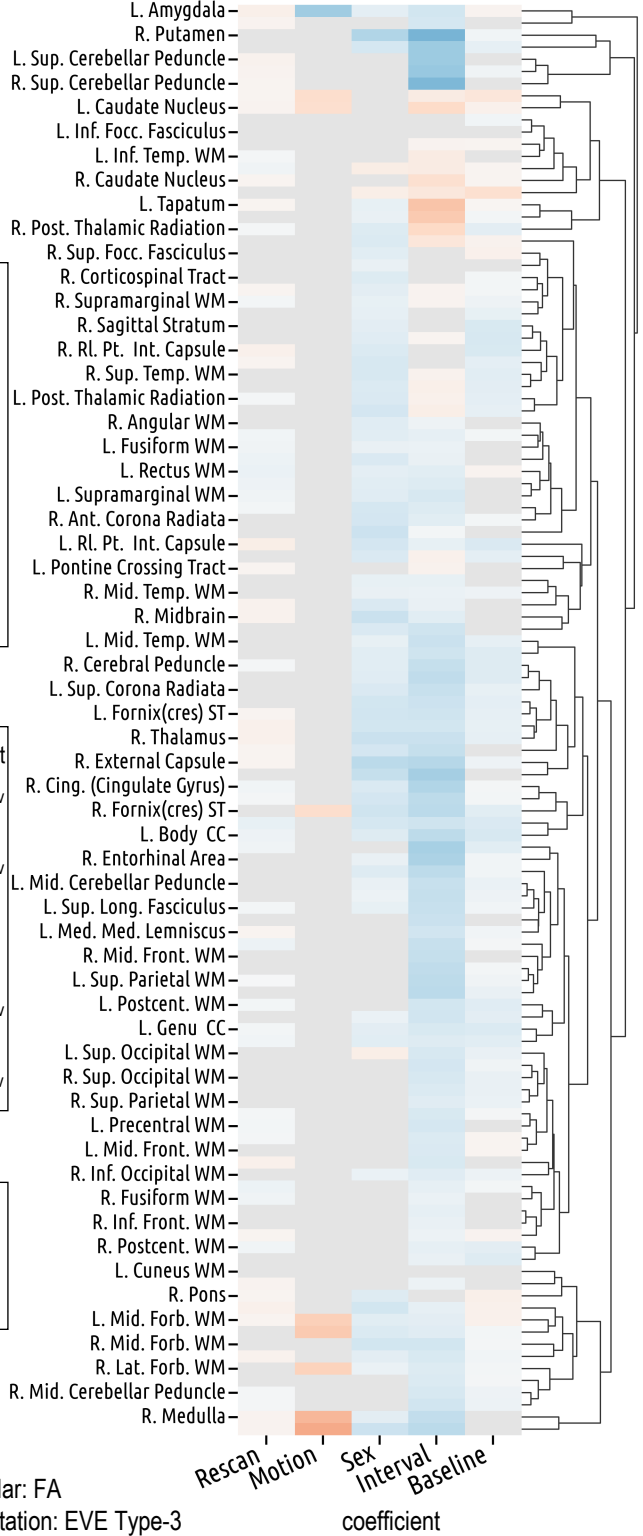

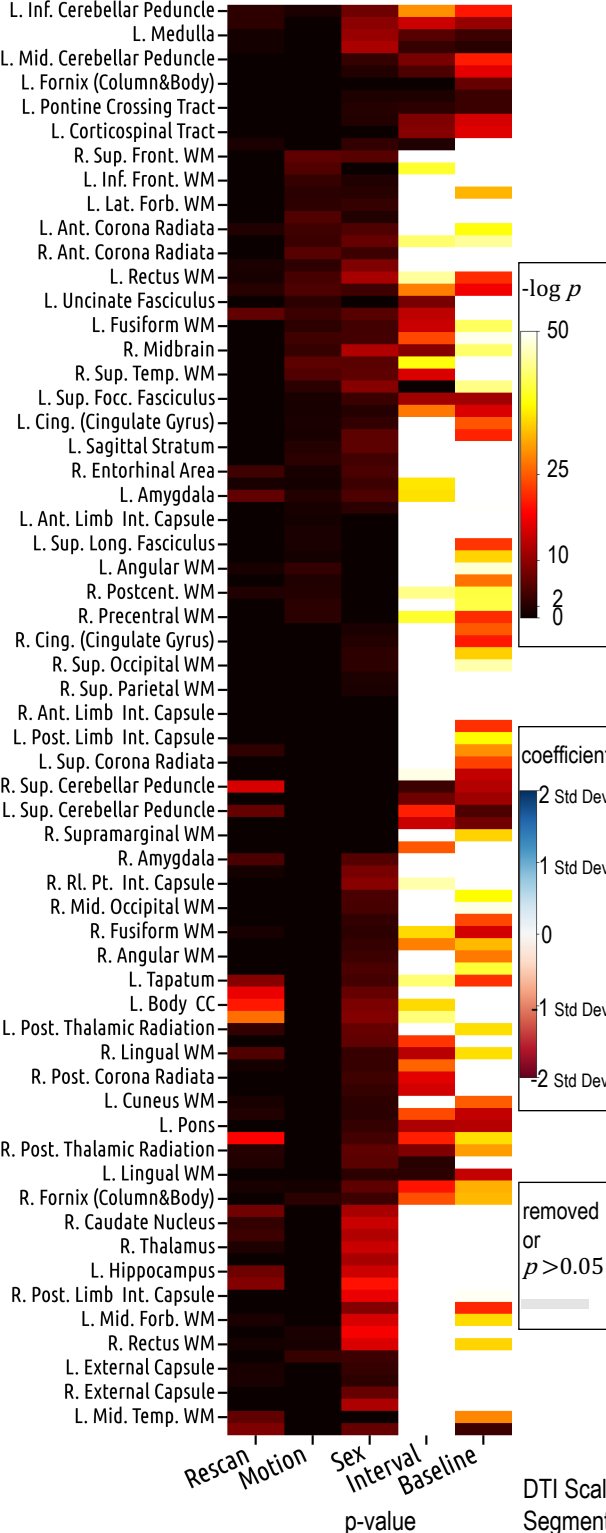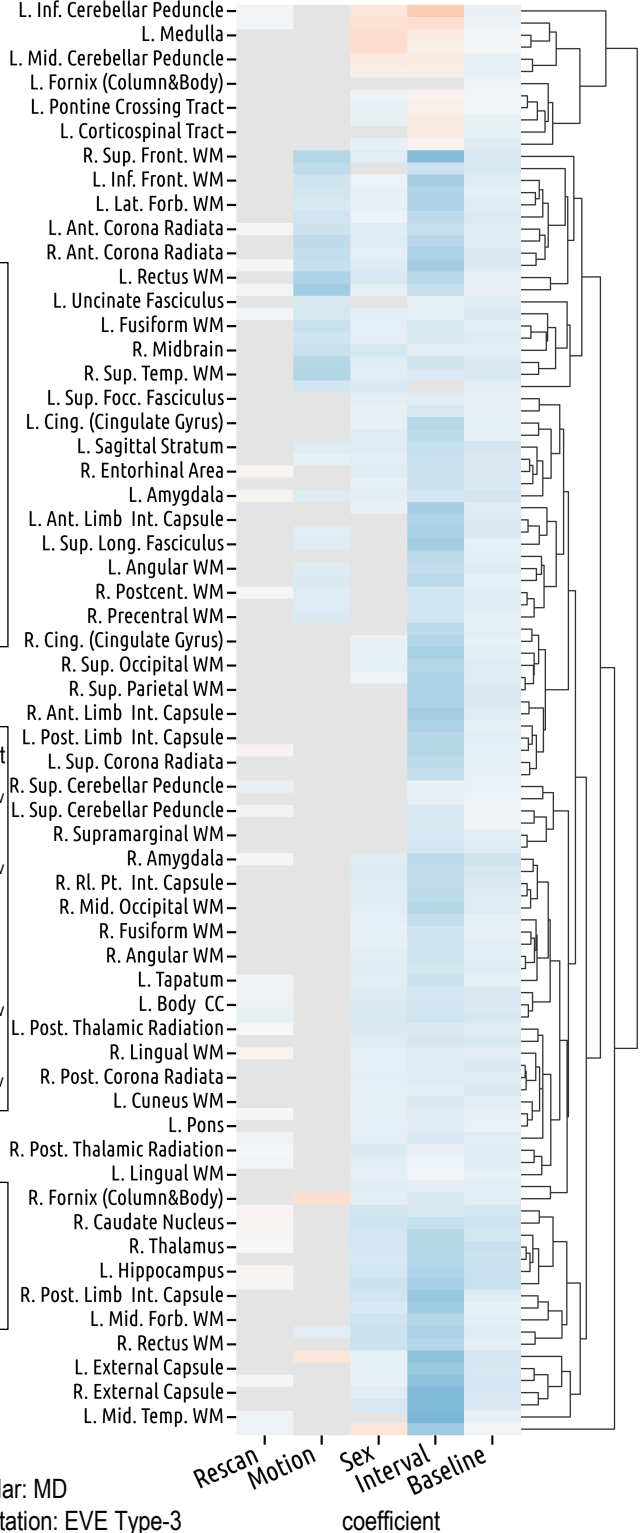

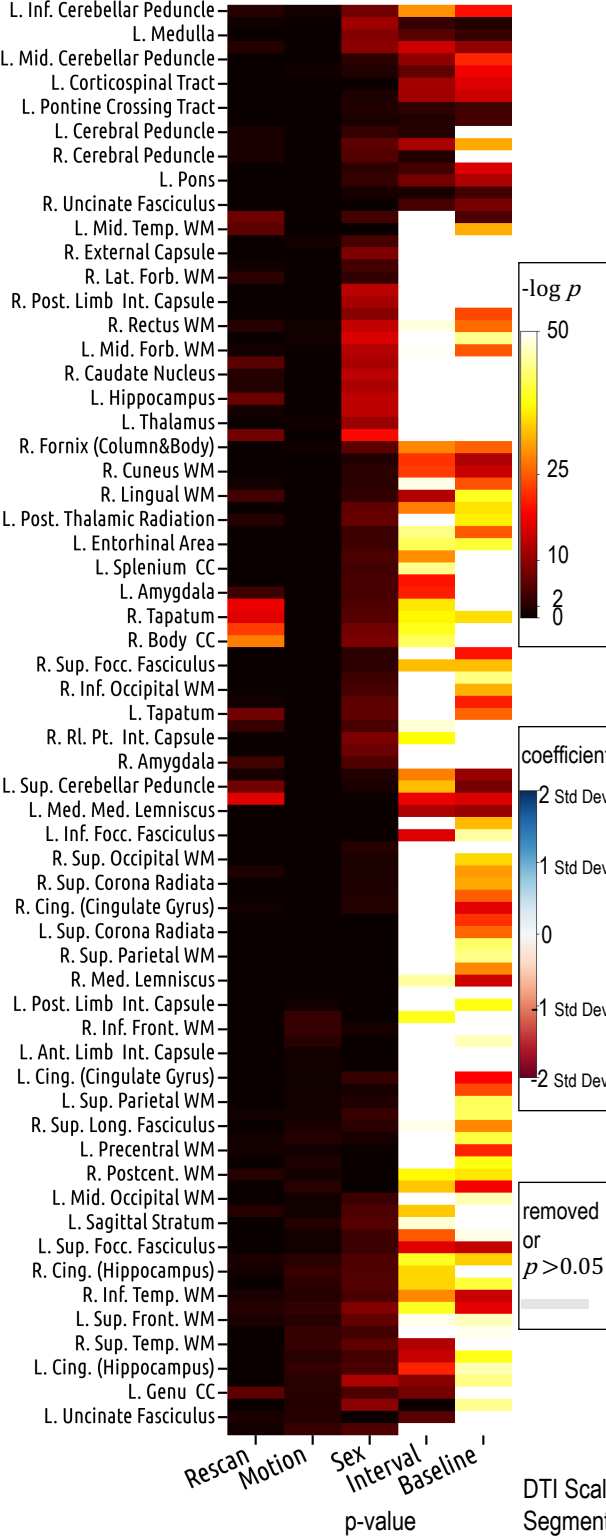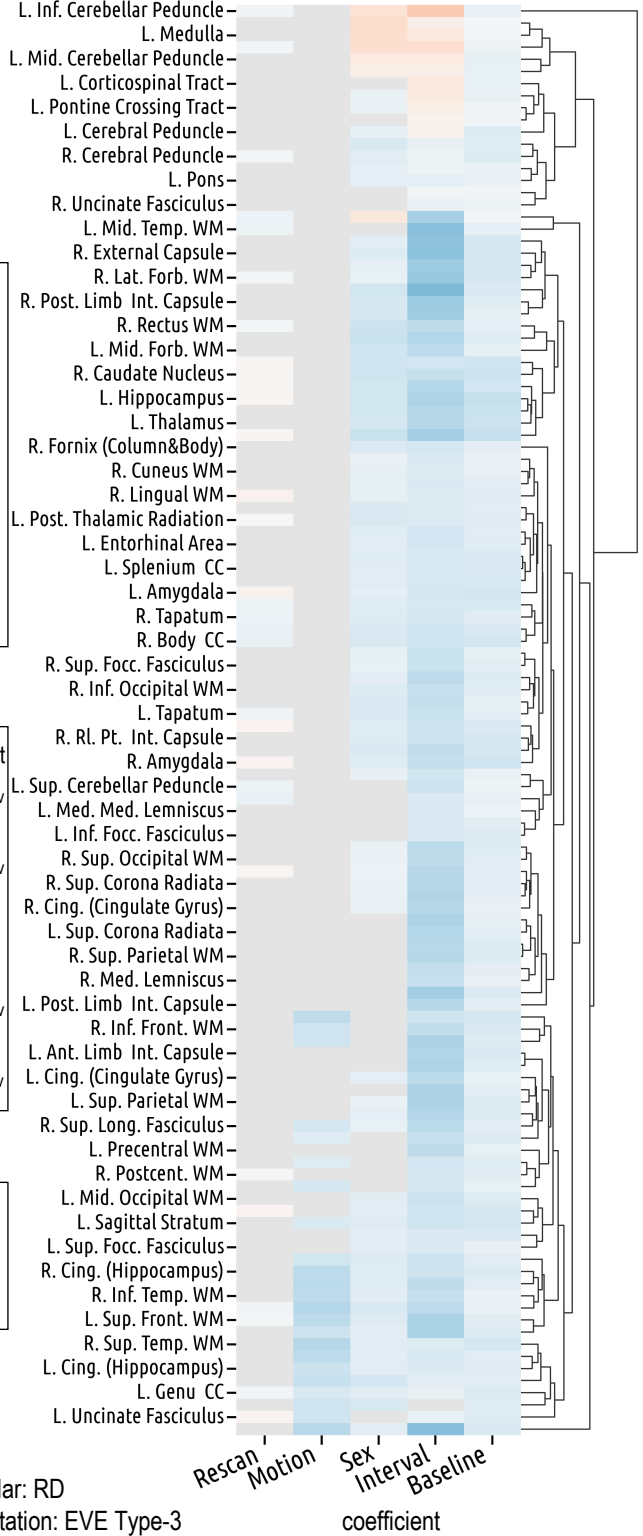

Supplement: Supplementary file [file media-1.pdf]
